# Supplementary material for: l-Asparagine–EDTA–amide silica-coated MNPs: a highly efficient and nano-ordered multifunctional core–shell organocatalyst for green synthesis of 3,4-dihydropyrimidin-2(1H)-one compounds
Source: Royal Society of Chemistry journal article supplement (doi:10.1039/d2ra02935a), 2022-01-01
Supplement: d2ra02935a1.pdf [file d2ra02935a1.pdf]

## Electronic Supporting Information

### L-Asparagine-EDTA-amide silica-coated MNPs: a highly efficient and nano-ordered multifunctional core-shell organocatalyst for green synthesis of 3,4-dihydropyrimidin-2(1H)-one compounds

Negin Rostami<sup>a</sup>, Mohammad G. Dekamin<sup>\*a</sup>, Ehsan Valiey<sup>a</sup> and Hamidreza FaniMoghadam<sup>a</sup>

*Pharmaceutical and Biologically-Active Compounds Research Laboratory, Department of Chemistry, Iran University of Science and Technology, Tehran 16846-13114, Iran*

*Tel: +98-21-77240640-50; fax: +98-21-73021584; e-mail: mdekamin@iust.ac.ir*

| Content                                                                                                                                                                                                                 | Page |
|-------------------------------------------------------------------------------------------------------------------------------------------------------------------------------------------------------------------------|------|
| Title page                                                                                                                                                                                                              | S1   |
| Schematic preparation of Fe <sub>3</sub> O <sub>4</sub> @SiO <sub>2</sub> -APTS-EDTA-asparagine ( <b>1</b> ), as a heterogeneous nanocatalyst, for the synthesis of 3,4-dihydropyrimidin-2(1H)-one <b>5</b> derivatives | S2   |
| Characterization of the Fe <sub>3</sub> O <sub>4</sub> @SiO <sub>2</sub> -APTS-EDTA-asparagine ( <b>1</b> )                                                                                                             | S3   |
| Reusability of the Fe <sub>3</sub> O <sub>4</sub> @SiO <sub>2</sub> -APTS-EDTA-asparagine ( <b>1</b> ) nanocatalyst for the synthesis of <b>5a</b>                                                                      | S9   |
| <b>Table S1.</b> Calculation of green chemistry metrics for compound <b>5a</b>                                                                                                                                          | S10  |
| Chemical characterization of 5-ethoxycarbonyl-6-methyl-4-(3-nitrophenyl)-3,4-dihydropyrimidin-2(1H)-one ( <b>5e</b> )                                                                                                   | S11  |
| Chemical characterization of 5-methoxycarbonyl-4-(2,4-dichlorophenyl)-6-methyl-3,4-dihydropyrimidine-2(1H)-one ( <b>5m</b> )                                                                                            | S12  |
| Chemical characterization of 5-methoxycarbonyl-6-methyl-4-(thiophen-2-yl)-3,4-dihydropyrimidin-2(1H)-one ( <b>5t</b> )                                                                                                  | S13  |

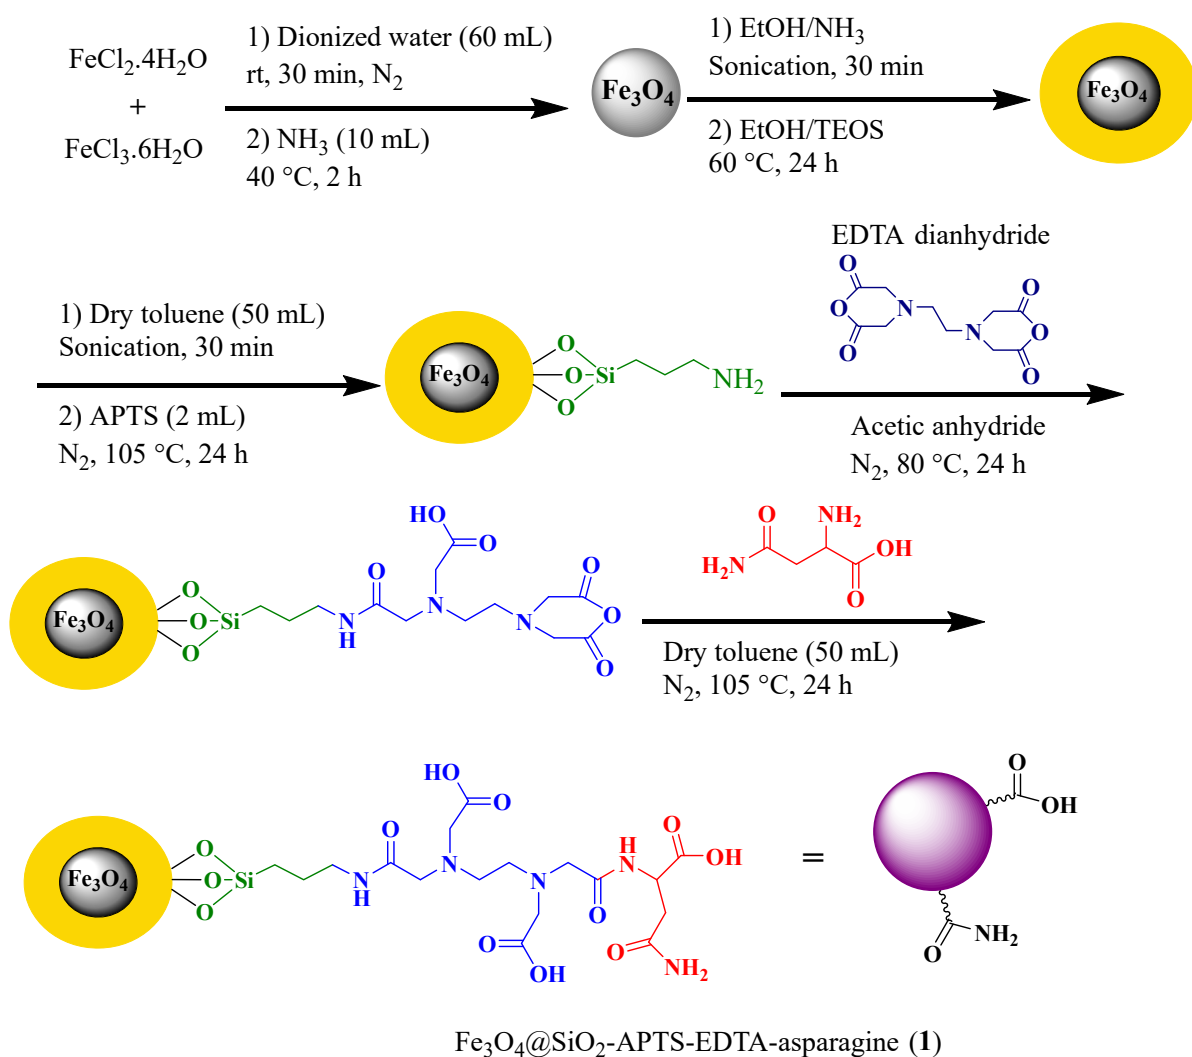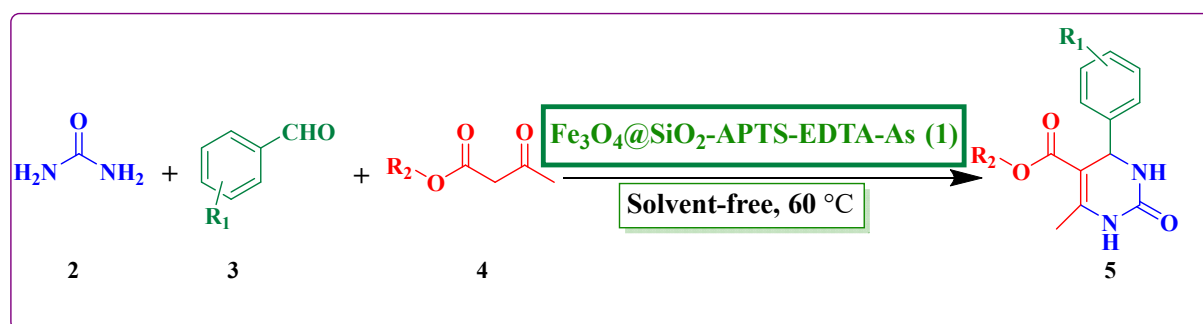

**Scheme S1.** Schematic preparation of  $\text{Fe}_3\text{O}_4@SiO_2\text{-APTS-EDTA-asparagine (1)}$ , as a heterogeneous nanocatalyst, for the synthesis of 3,4-dihydropyrimidin-2(1H)-one **5** derivatives

### Characterization of the Fe<sub>3</sub>O<sub>4</sub>@SiO<sub>2</sub>-APTS-EDTA-asparagine (1)

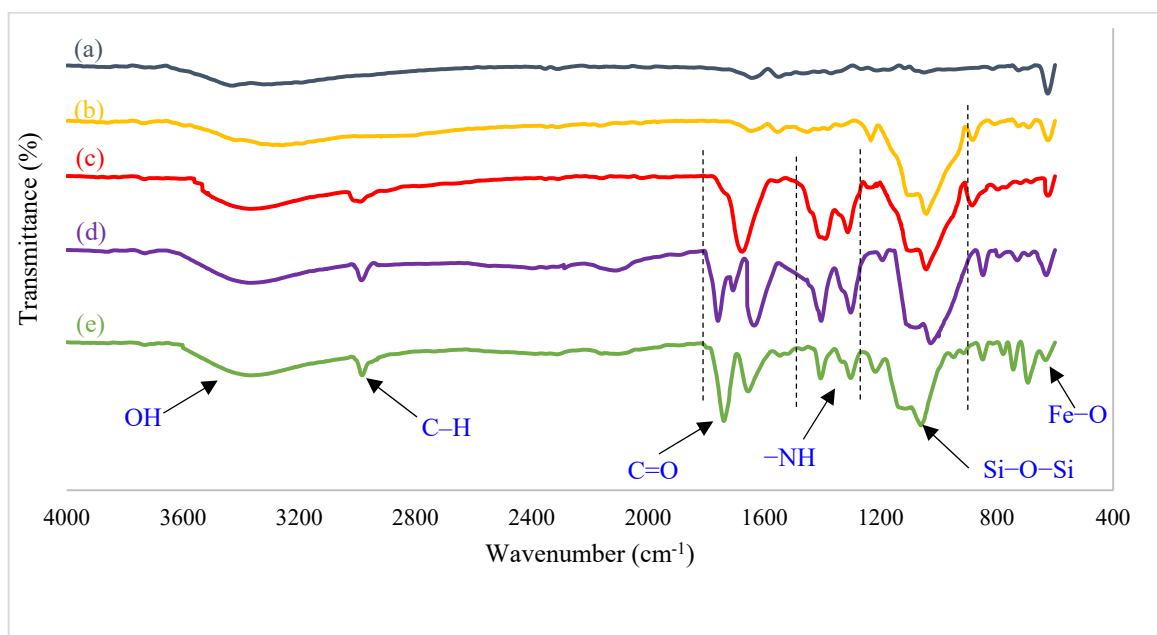

**Fig S1.** FT-IR spectra of the Fe<sub>3</sub>O<sub>4</sub> (a), Fe<sub>3</sub>O<sub>4</sub>@SiO<sub>2</sub> (b), Fe<sub>3</sub>O<sub>4</sub>@SiO<sub>2</sub>-APTS (c), Fe<sub>3</sub>O<sub>4</sub>@SiO<sub>2</sub>-APTS-EDTA (d) and Fe<sub>3</sub>O<sub>4</sub>@SiO<sub>2</sub>-APTS-EDTA-asparagine (1, e).

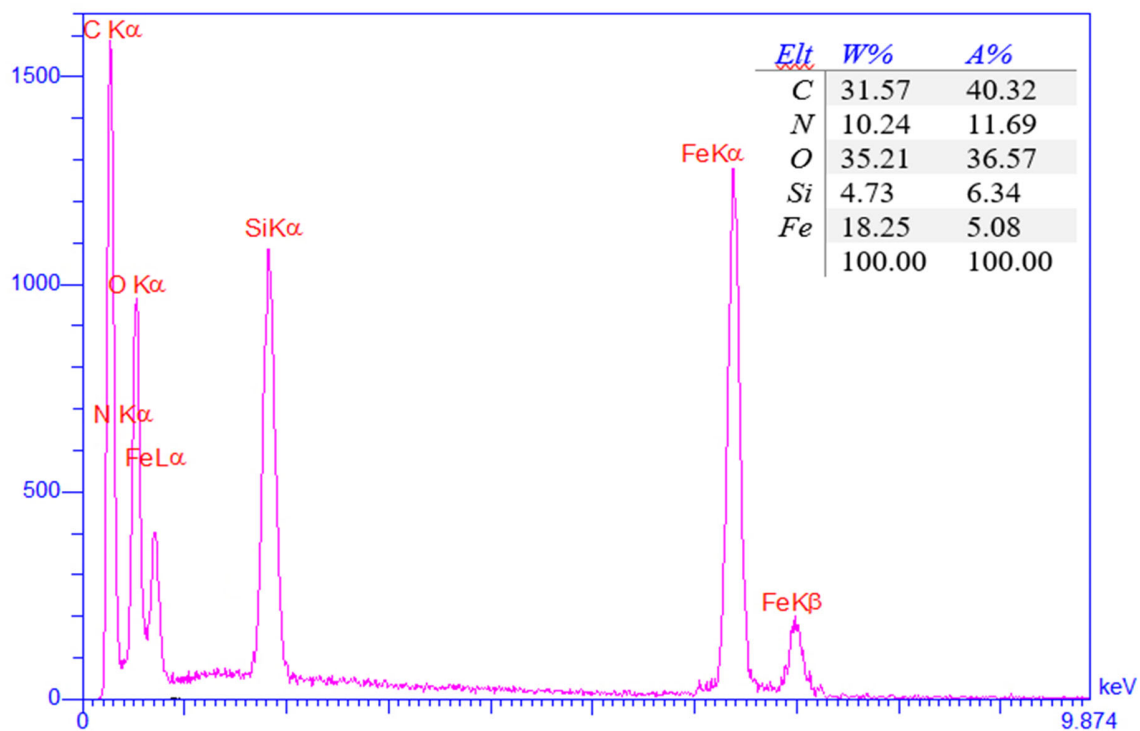

**Fig S2.** The EDX spectra of the Fe<sub>3</sub>O<sub>4</sub>@SiO<sub>2</sub>-APTS-EDTA-asparagine (1).

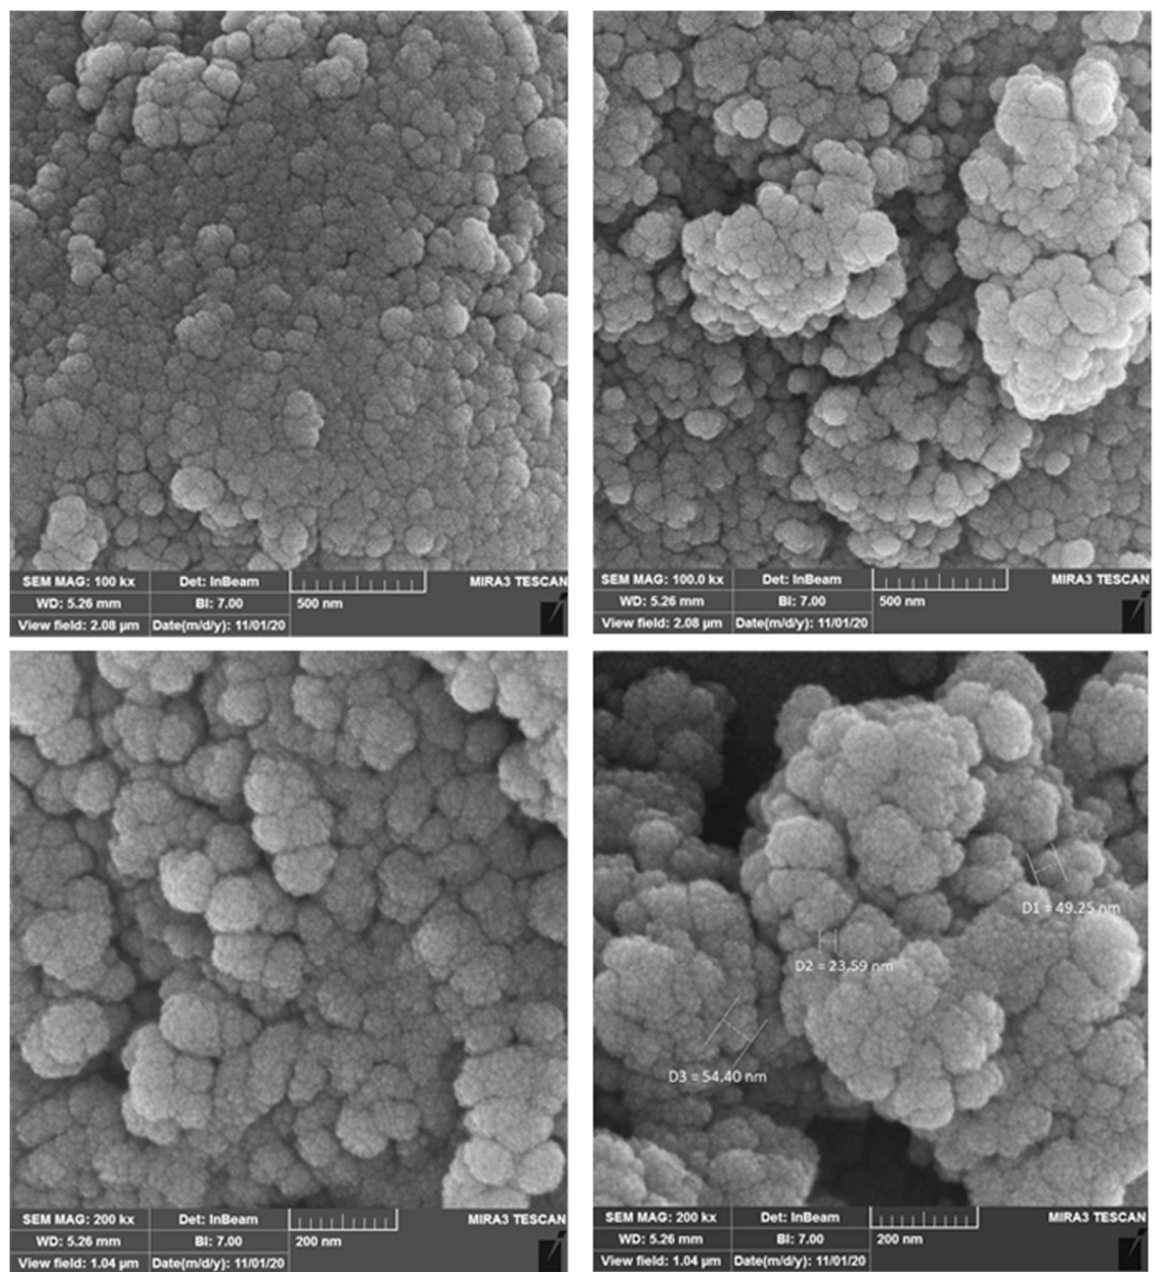

**Fig S3.** FESEM images of the  $\text{Fe}_3\text{O}_4@\text{SiO}_2\text{-APTS-EDTA-asparagine (1)}$ .

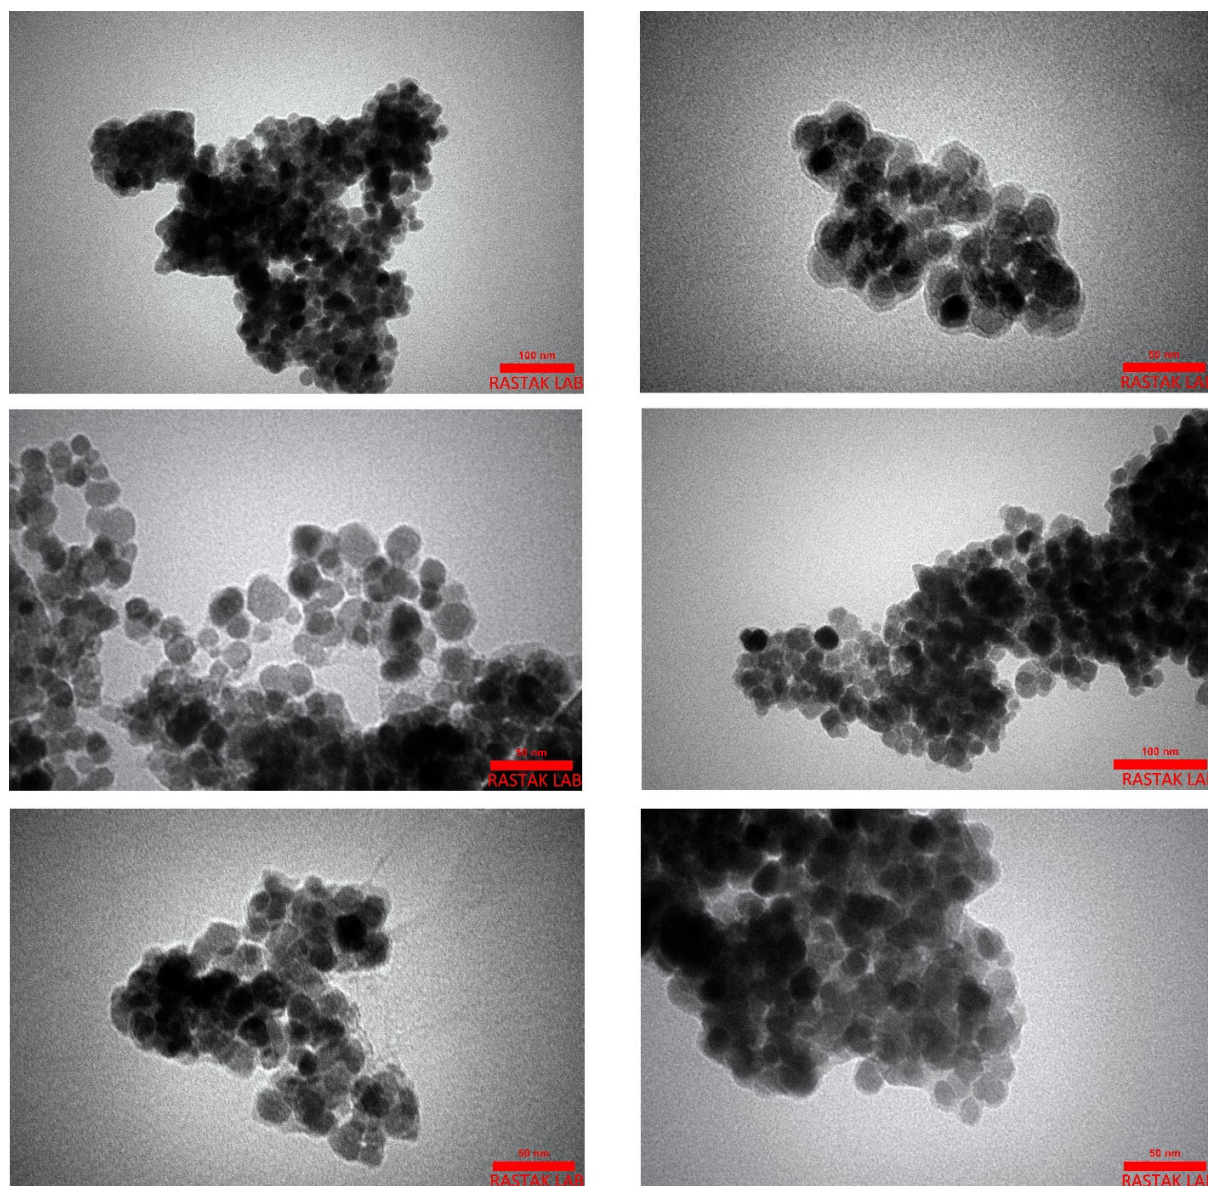

**Fig S4.** TEM images of the  $\text{Fe}_3\text{O}_4@\text{SiO}_2\text{-APTS-EDTA-asparagine (1)}$ .

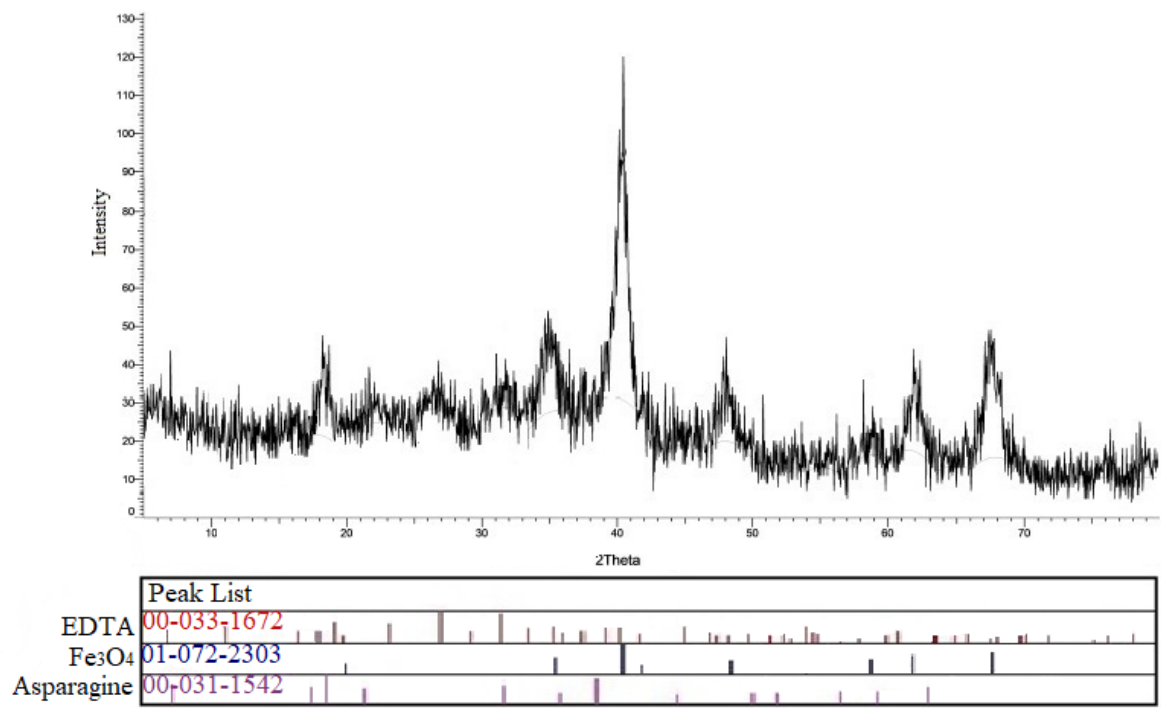

Fig S5. XRD pattern of the Fe<sub>3</sub>O<sub>4</sub>@SiO<sub>2</sub>-APTS-EDTA-asparagine (1).

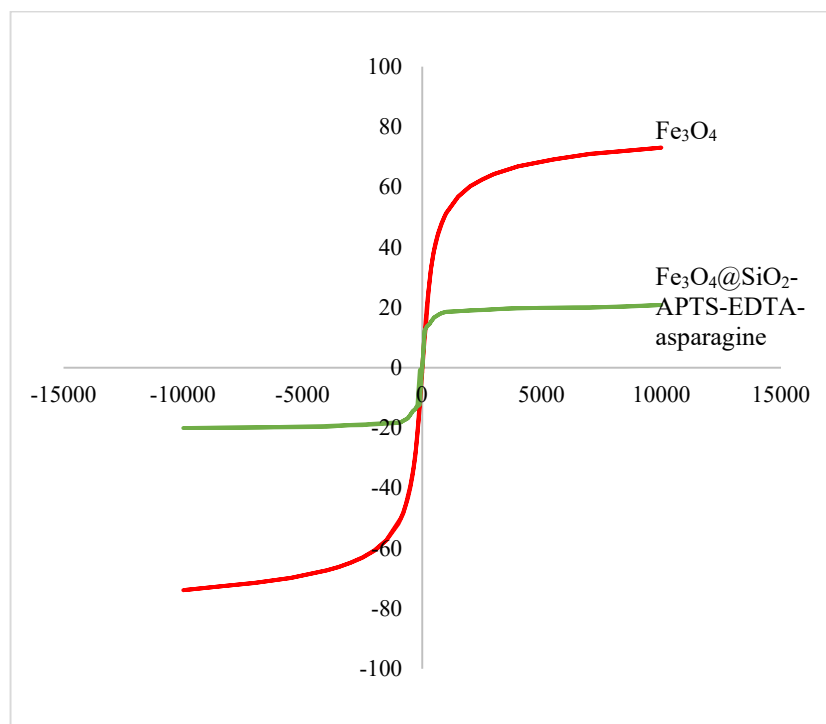

Fig S6. VSM pattern of Fe<sub>3</sub>O<sub>4</sub> (red) and Fe<sub>3</sub>O<sub>4</sub>@SiO<sub>2</sub>-APTS-EDTA-asparagine (1, green).

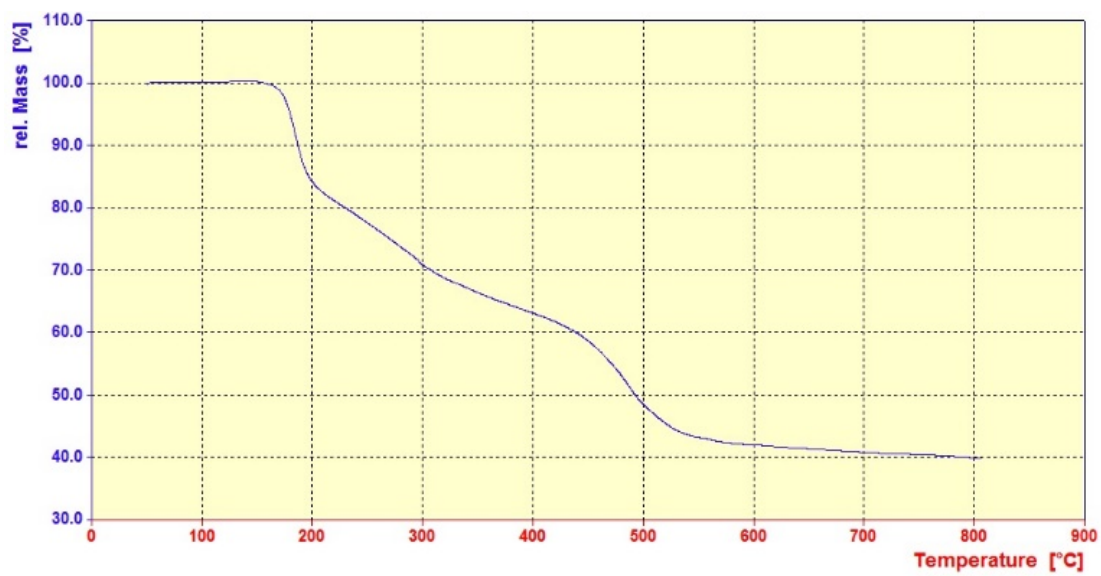

**Fig S7.** TGA curve of the Fe<sub>3</sub>O<sub>4</sub>@SiO<sub>2</sub>-APTS-EDTA-asparagine (1)

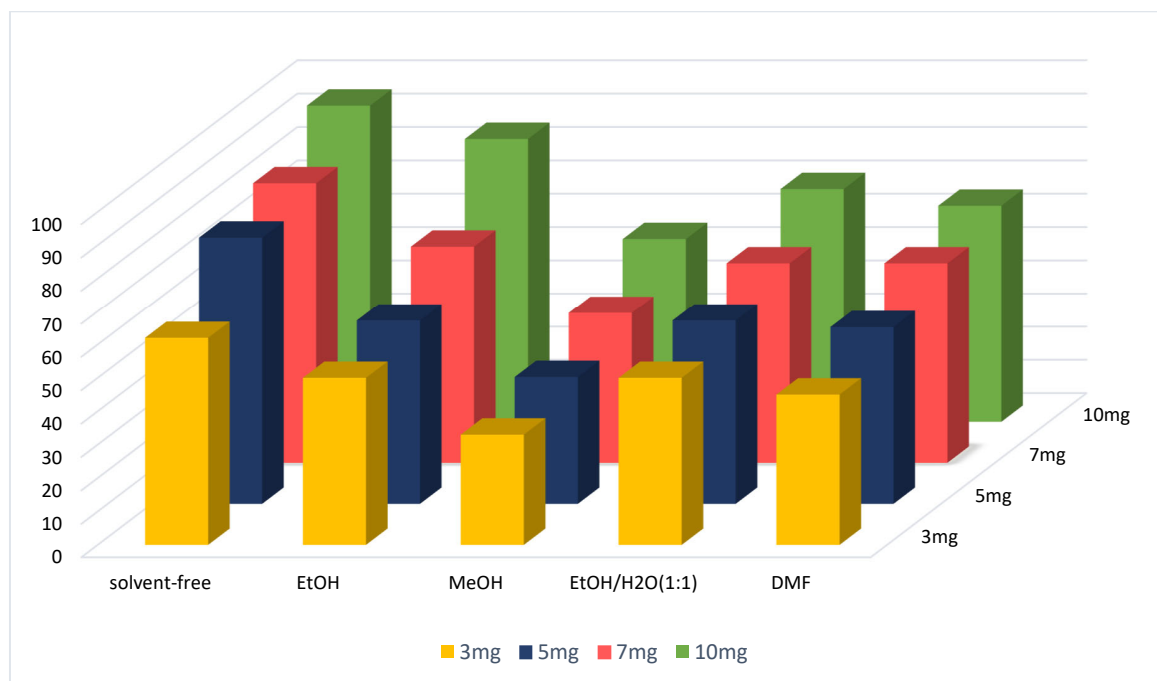

**Fig S8.** Effect of solvent and the amount of  $\text{Fe}_3\text{O}_4@\text{SiO}_2\text{-APTS-EDTA-asparagine (1)}$  nanocatalyst on the model reaction.



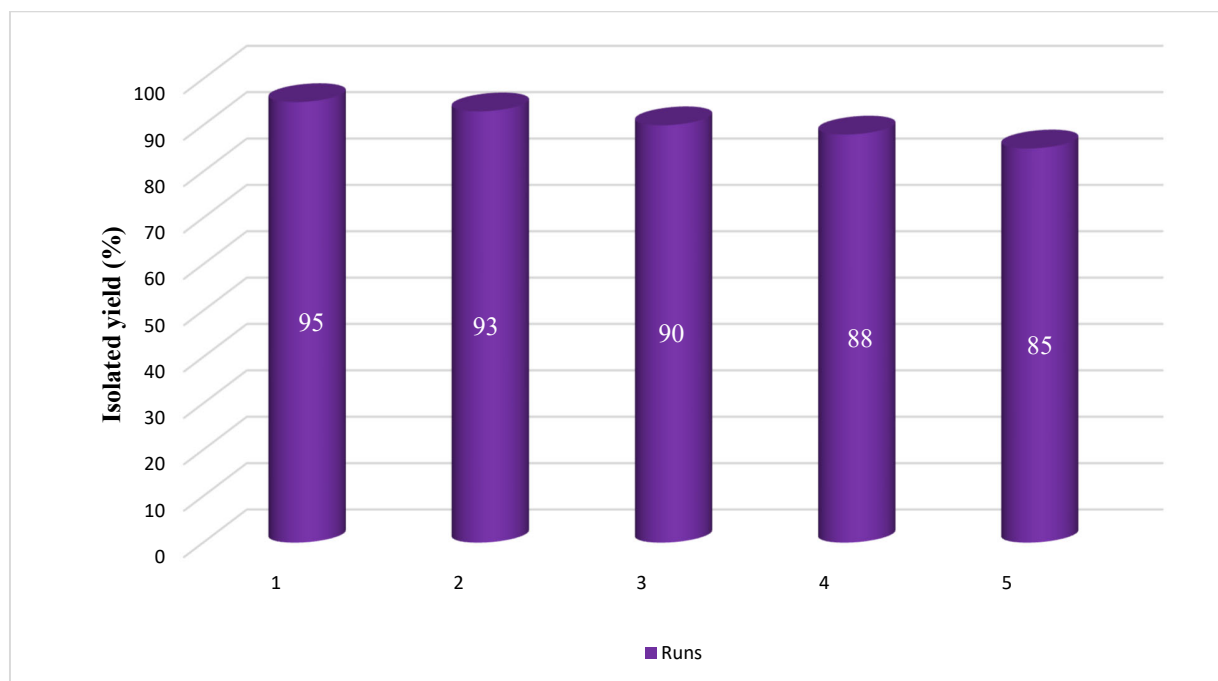

**Fig S9.** Reusability of the  $\text{Fe}_3\text{O}_4@\text{SiO}_2\text{-APTS-EDTA-asparagine (1)}$  nanocatalyst for the synthesis of **5a**.

**Table S1.** Calculation of green chemistry metrics for compound **5a**.

|             |             |              |              |        |
|-------------|-------------|--------------|--------------|--------|
| Molar mass: | 60.06 g/mol | 140.57 g/mol | 130.14 g/mol |        |
|             | 294.74g/mol |              |              |        |
| mmol        | 1.0 mmol    | 1.0 mmol     | 1.0 mmol     | 0.96   |
| mmol        |             |              |              |        |
| amount      | 60.06 mg    | 140.57 mg    | 130.14 mg    | 282.95 |
| mg          |             |              |              |        |

  

| Parameters | Characteristics                                                                                                                                                                                                                                                       | Formula                                                                       | Ideal Value | Calculated value for compound 5a                                                         |
|------------|-----------------------------------------------------------------------------------------------------------------------------------------------------------------------------------------------------------------------------------------------------------------------|-------------------------------------------------------------------------------|-------------|------------------------------------------------------------------------------------------|
| 1          | Environmental (E) factor<br>E-factor signifies the total amount of waste generated in a chemical reaction.                                                                                                                                                            | [Total mass of raw materials - the total mass of product]/<br>mass of product | 0           | [(60.06 + 140.57 + 130.14) - 282.95]/ 282.95 = 0.16                                      |
| 2          | Atom economy (AE%)<br>Atom economy signifies the percentage of atoms wasted in chemical reaction. Higher the value of AE, greener is the reaction. Maximum value of atom economy is 100% which indicates that all the atoms present in reactants lies in the product. | [MW of product] ÷ Σ(MW of stoichiometric reactants) × 100                     | 100%        | [(294.74)/(60.06 + 140.57 + 130.14)] × 100 = 89.1%                                       |
| 3          | Carbon efficiency (CE%)<br>CE signifies the percentage of carbons in the reactants that is left in the product.                                                                                                                                                       | [Amount of carbon in product/ Total carbon present in reactants] × 100        | 100%        | [0.96 × 14 / (1.0 × 1 + 1.0 × 7 + 1.0 × 6)] × 100 = [6.72 / (0.5 + 3.5 + 3)] × 100 = 96% |
| 4          | Process mass intensity (PMI)<br>PMI takes into account reaction efficiency, stoichiometry, amount of solvent and all reagent used in the chemical reaction.                                                                                                           | Σ (mass of stoichiometric reactants)/[mass of stoichiometry product]          | 1           | (60.06 + 140.57 + 130.14) / 282.95 = 1.16                                                |
| 5          | Reaction mass efficiency (RME %)<br>RME accounts into atom economy, chemical yield and stoichiometry.                                                                                                                                                                 | [mass of product/Σ (mass of stoichiometric reactants)] × 100                  | 100%        | [282.95/(60.06 + 140.57 + 130.14)] × 100 = 85.5%                                         |

5-Ethoxycarbonyl-6-methyl-4-(3-nitrophenyl)-3,4-dihydropyrimidin-2(1H)-one (**nifetepimine, 5e**)

M.P. = 211-212 °C; FT-IR (KBr,  $\text{cm}^{-1}$ )  $\nu$  = 3324, 3087, 2955, 1689, 1622, 1567, 1453, 1218, 1082;  $^1\text{H NMR}$  (500MHz,  $\text{DMSO-d}_6$ )  $\delta$  (ppm) = 1.10 (t, 3H,  $\text{OCH}_2\text{CH}_3$ ), 2.28 (s, 3H,  $\text{CH}_3$ ), 4.0 (q, 2H,  $\text{OCH}_2$ ), 5.31 (s, 1H, CH), 7.66 – 8.15 (m, 4H, Ar-H), 7.9 (brs, 1H, NH), 9.37 (brs, 1H, NH).

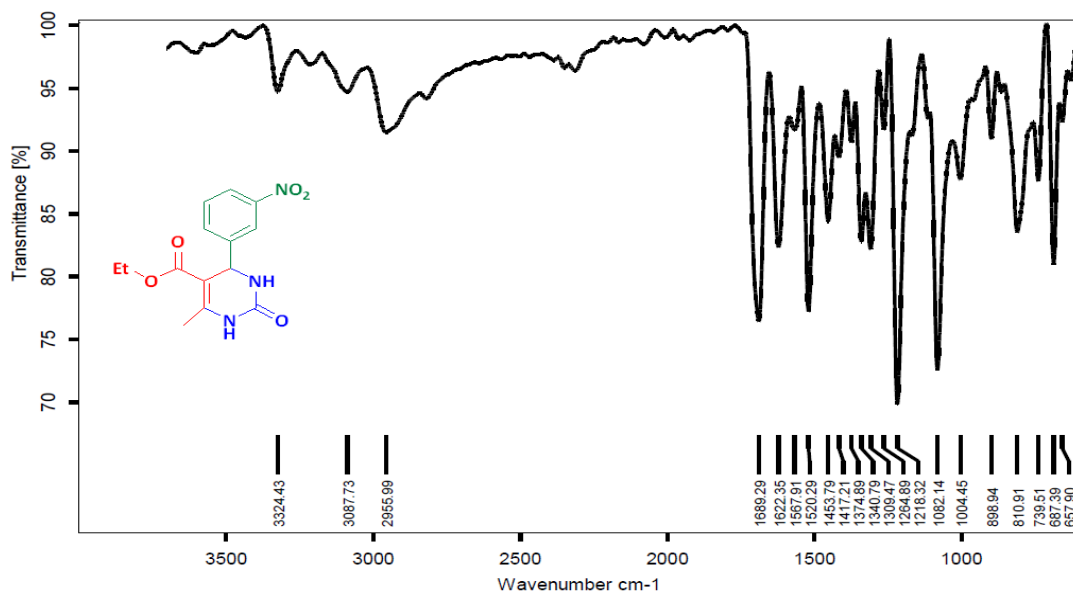

Fig S10. FT-IR spectrum of 5-Ethoxycarbonyl-6-methyl-4-(3-nitrophenyl)-3,4-dihydropyrimidin-2(1H)-one (**5e**).

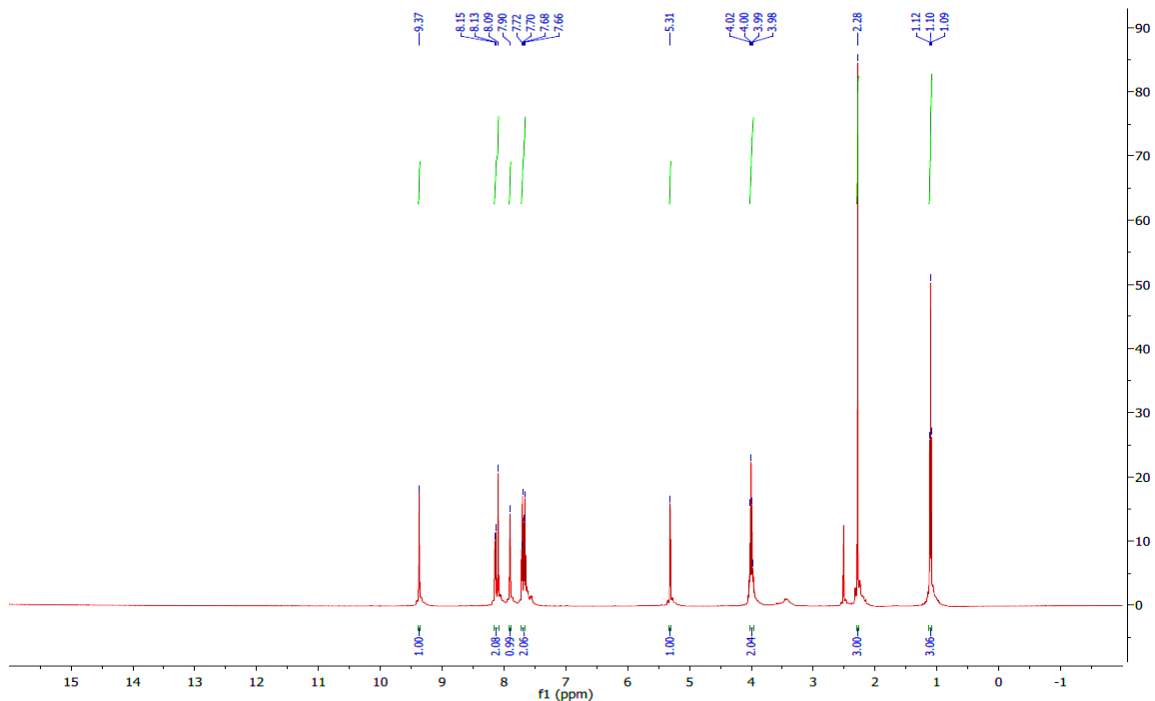

Fig S11.  $^1\text{H NMR}$  spectrum of 5-Ethoxycarbonyl-6-methyl-4-(3-nitrophenyl)-3,4-dihydropyrimidin-2(1H)-one (**5e**).

5-Methoxycarbonyl-4-(2,4-dichlorophenyl)-6-methyl-3,4-dihydropyrimidine-2(1H)-one (**5m**)

M.P. = 252-254 °C; FT-IR (KBr,  $\text{cm}^{-1}$ )  $\nu$  = 3357, 3216, 3093, 2946, 1694, 1641, 1454, 1223, 1096;  $^1\text{H}$ NMR (500MHz, DMSO- $d_6$ )  $\delta$  (ppm)= 2.30 (s, 3H,  $\text{CH}_3$ ), 3.46 (s, 3H,  $\text{OCH}_3$ ), 5.59 (s, 1H, CH), 7.31-7.42 (dd, 2H, Ar-H), 7.56 (s, 1H, Ar-H), 7.76 (brs, 1H, NH), 9.35 (brs, 1H, NH).

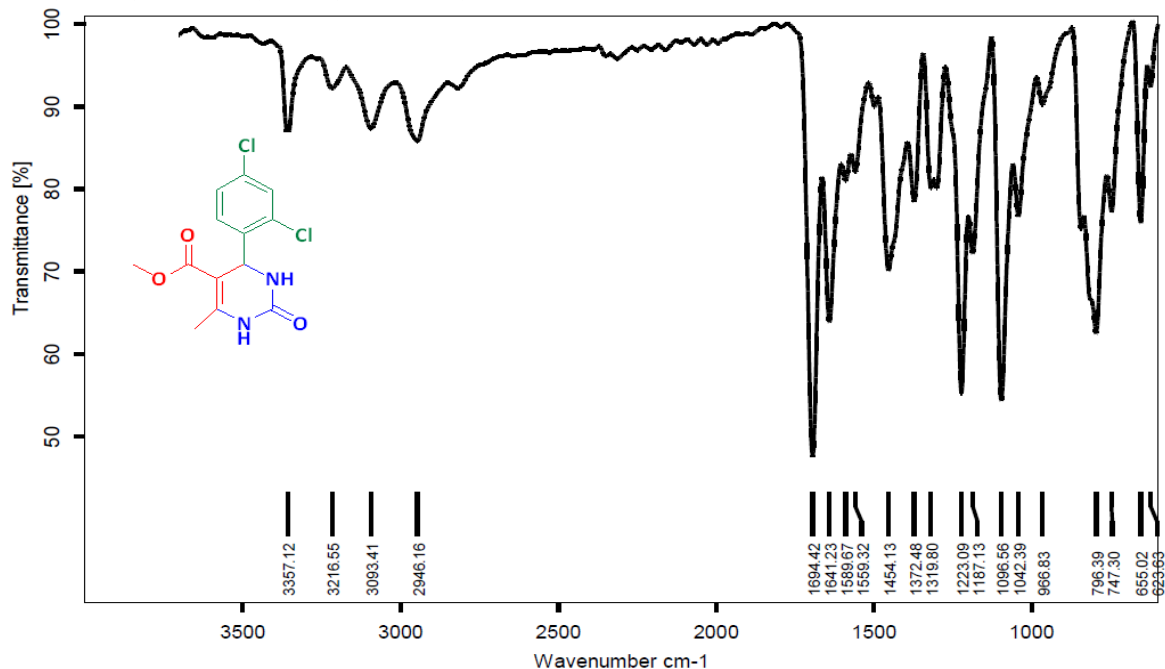

Fig S12. FT-IR spectrum of 5-Methoxycarbonyl-4-(2,4-dichlorophenyl)-6-methyl-3,4-dihydropyrimidine-2(1H)-one (**5m**).

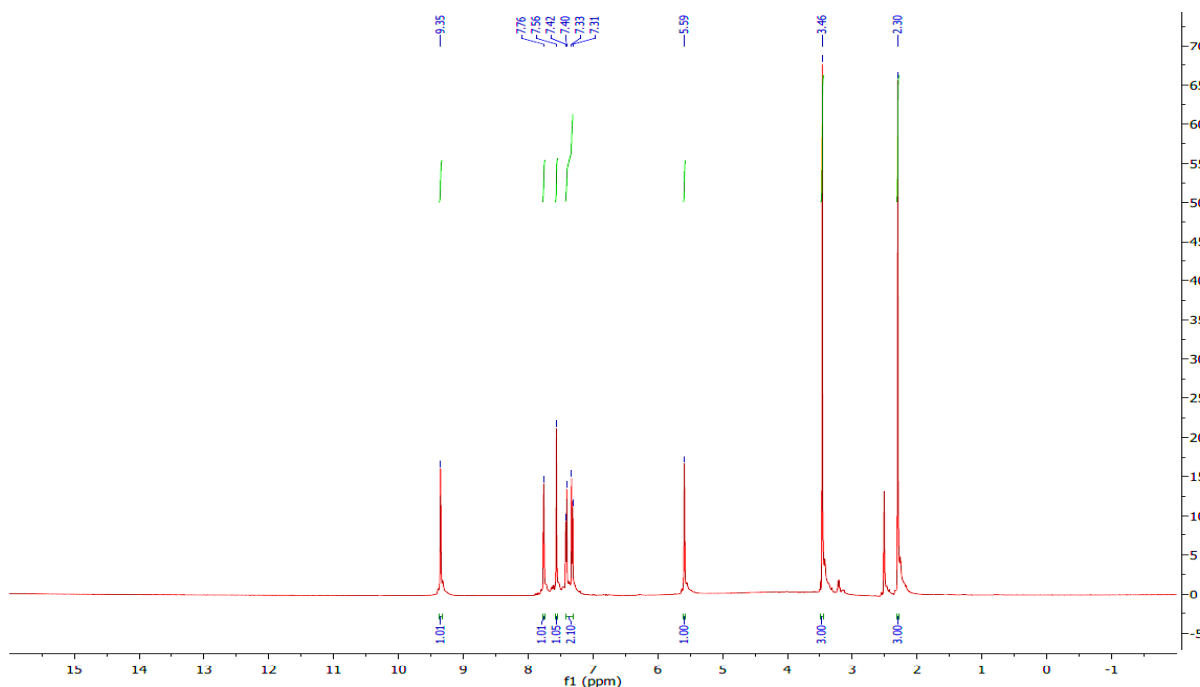

Fig S13.  $^1\text{H}$  NMR spectrum of 5-Methoxycarbonyl-4-(2,4-dichlorophenyl)-6-methyl-3,4-dihydropyrimidine-2(1H)-one (**5m**)

5-Methoxycarbonyl-6-methyl-4-(thiophen-2-yl)-3,4-dihydropyrimidin-2(1H)-one (**5t**)

M.P. = 224-226°C; FT-IR (KBr,  $\text{cm}^{-1}$ )  $\nu$  = 3344, 3106, 2946, 1690, 1639, 1423, 1226, 1089;  $^1\text{H}$ NMR (500MHz, DMSO- $d_6$ )  $\delta$  (ppm) = 2.23 (s, 3H,  $\text{CH}_3$ ), 3.61 (s, 3H,  $\text{OCH}_3$ ), 5.41 (s, 1H, CH), 6.90 – 6.96 (m, 2H, Ar-H), 7.37 (s, H, H-CS), 7.91 (brs, 1H, NH), 9.34 (brs, 1H, NH).

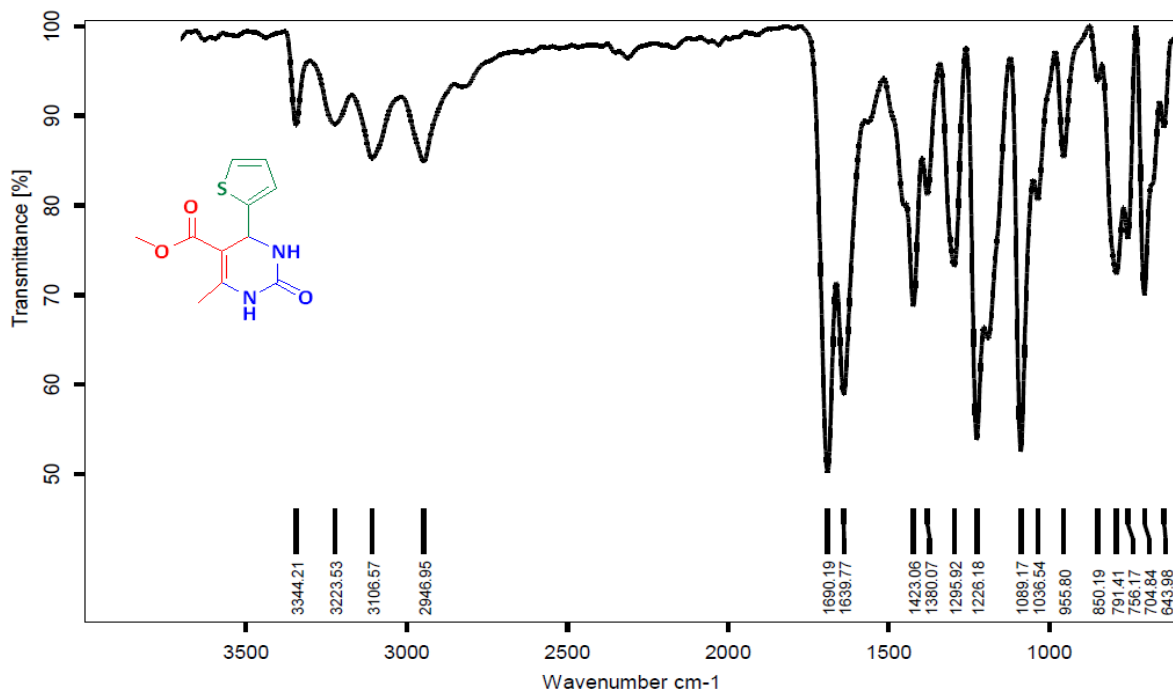

Fig S14. FT-IR spectrum of 5-Methoxycarbonyl-6-methyl-4-(thiophen-2-yl)-3,4-dihydropyrimidin-2(1H)-one (**5t**).

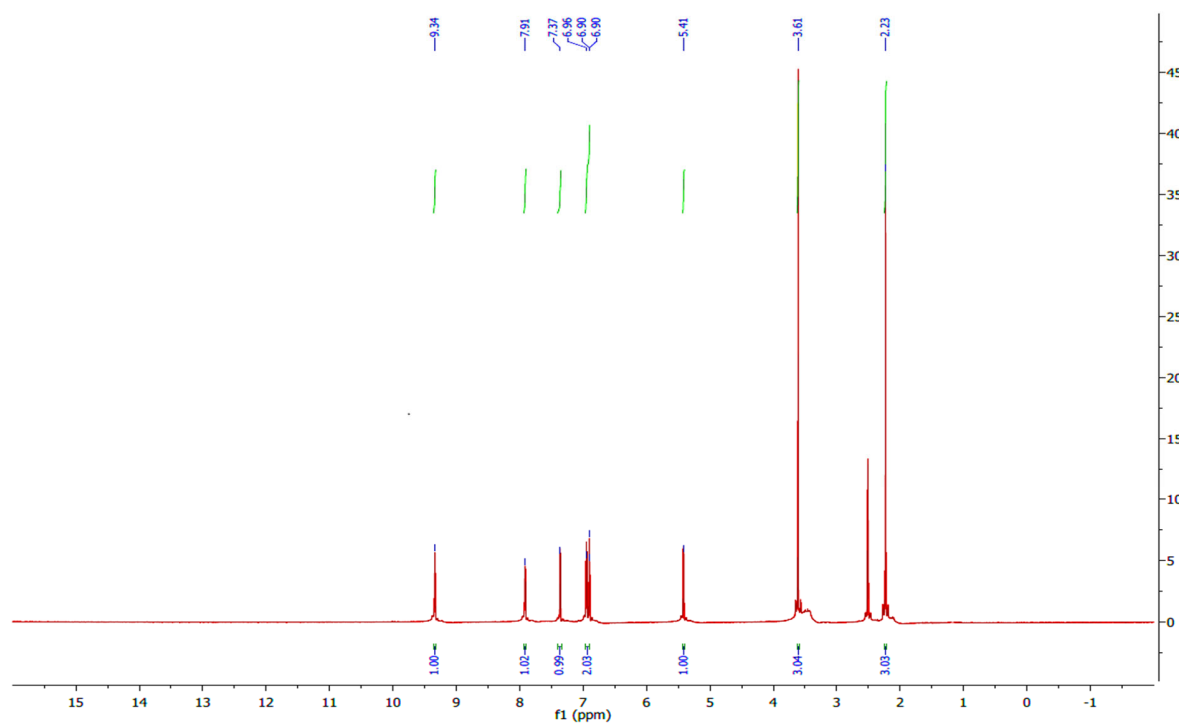

Fig S15.  $^1\text{H}$ NMR spectrum of 5-Methoxycarbonyl-6-methyl-4-(thiophen-2-yl)-3,4-dihydropyrimidin-2(1H)-one (**5t**).
